# Supplementary material for: MicroRNAs Modulate Oxidative Stress in Hypertension through PARP-1 Regulation
Source: Oxid Med Cell Longev. 2017 Jun 4;2017:3984280. doi: 10.1155/2017/3984280 (PMC5474262; doi:10.1155/2017/3984280)
Supplement: Supplementary file 1 — Supplementary Dataset 1: Predicted MicroRNA Target List. [file 3984280.f1.xls]

## Sheet: miR-103a-2-5p Summary
DIANA microT predicted targets	Genes significantly repressed ≥ 1.5-fold by miRNA over-expression in HAECs	Predicted targets repressed ≥ 1.5-fold by miRNA over-expression in HAECs and differentially expressed in PMBCs
MARCH1	ABLIM1	ABLIM1
MARCH3	ACAT1	ACAT1
MARCH4	AK3	AMD1
MARCH6	AMD1	ATF6
MARCH7	ANAPC13	BMI1
MARCH10	ANKRD11	BNIP3L
MARCH11	AP1B1	CCDC50
MARCH14	ASCC3	CD44
AASDHPPT	ATF6	CHM
AASS	BMI1	HIF1A
AATF	BNIP3L	HPRT1
ABCA10	BRD7	HSPA5
ABCA13	C18orf21	JAM3
ABCA2	CAPZA1	LARP1B
ABCA5	CCDC50	LMO4
ABCA9	CCDC91	MAP2K3
ABCB1	CD44	PARP1
ABCB10	CEP78	PGM2
ABCB11	CHM	PIGN
ABCB6	CMPK1	POLA1
ABCB9	COBLL1	PROS1
ABCC3	CPNE3	PTGER4
ABCC8	DENR	PTPN11
ABCC9	DPY19L1	RAD21
ABCD2	EIF4G2	RAD23B
ABCG2	FLI1	RALGAPA1
ABHD10	G3BP1	TFRC
ABHD12	GLS	VRK1
ABHD12B	GPN3	ZNF207
ABHD16A	H2AFZ
ABHD2	HADH
ABHD6	HIF1A
ABI1	HPRT1
ABL2	HSPA5
ABLIM1	IGF2BP2
ABLIM3	IPO11
AC002472.13	ITPRIP
AC004381.6	JAM3
AC006946.15	KNTC1
AC009113.1	LARP1B
AC011298.2	LMO4
AC011897.1	MAP2K3
AC012123.1	MIS12
AC013269.5	MRPL1
AC023590.1	MTHFD2
AC073610.5	MTRF1L
AC079354.1	MYO5A
AC091801.1	NNT
AC092329.1	NUCKS1
AC092535.1	NUP107
AC093510.2	NUP43
AC093802.1	NUSAP1
AC099552.4	OSTC
AC102948.2	OTUD6B
AC110619.2	OXR1
AC135352.1	PAK2
ACAA1	PARP1
ACAD9	PCNP
ACADSB	PGM2
ACAP2	PHF14
ACAP3	PIGN
ACAT1	POLA1
ACE	POLA2
ACER3	POLR1E
ACLY	PPM1D
ACN9	PPP1CC
ACOT11	PPP1R16B
ACOT13	PRKRA
ACOT7	PROS1
ACSBG1	PSIP1
ACSBG2	PTGER4
ACSL1	PTPN11
ACSS1	RAD21
ACSS2	RAD23B
ACTA1	RAD51AP1
ACTB	RALGAPA1
ACTC1	RAP2C
ACTL6A	RASSF2
ACTR2	REEP5
ACTR6	RPP40
ACVR1	RSRC2
ACVR2A	RTTN
ADAD1	RWDD1
ADAL	SAR1A
ADAM10	SLC25A20
ADAM19	SLC44A1
ADAM22	SLFN11
ADAM23	SLK
ADAM33	SMC2
ADAM7	SRP72
ADAMDEC1	SRP9
ADAMTS1	STX6
ADAMTS15	SUCLG2
ADAMTS17	TAF1B
ADAMTS18	TFAM
ADAMTS5	TFRC
ADAMTSL3	TJP2
ADAR	TNPO1
ADARB1	TSPAN18
ADAT1	UBE2D4
ADAT2	UPF3B
ADCY2	USP8
ADCY4	VPS35
ADCY9	VRK1
ADCYAP1R1	WSB1
ADD1	ZFP91
ADGB	ZNF207
ADHFE1	ADAMTS1
ADIG	ADAMTS18
ADNP2	AFAP1
ADPGK	AIF1L
ADRA2A	AKTIP
AEBP2	ALDH3A2
AES	ALDH6A1
AFAP1	ANAPC1
AFF1	ARHGAP18
AFF2	ARSJ
AFF3	ART4
AFF4	ASNS
AFMID	ATAD2
AFTPH	BARD1
AGAP1	BIRC5
AGAP9	BRCA1
AGBL3	BUB1
AGGF1	BUB1B
AGO1	C12orf43
AGO3	C12orf65
AGPAT5	C21orf58
AGPS	CAPZB
AGXT2	CBX6
AHDC1	CCDC77
AHR	CCNA2
AIDA	CCNF
AIF1L	CD59
AIFM1	CDC25A
AIPL1	CDC25B
AK2	CDCA3
AK3	CDCA5
AK4	CDK5RAP2
AK5	CENPE
AKAP10	CENPF
AKAP17A	CGNL1
AKAP7	CKAP5
AKNAD1	CTNNAL1
AKTIP	CYYR1
AL033381.1	DCK
AL136115.1	DEPDC1
AL136219.1	DEPDC1B
AL137003.1	DIAPH1
AL355149.1	DNMT1
AL355390.1	DONSON
AL589645.1	DPYSL3
AL591684.1	DSCC1
AL592284.2	E2F2
AL603965.1	E2F7
ALCAM	ELOVL6
ALDH1A2	EPHA4
ALDH3A2	EPS8
ALDH5A1	EXO1
ALDH6A1	F2RL1
ALDH7A1	FAM107B
ALDOB	FAM133B
ALG1	FANCD2
ALG5	FAR1
ALKBH3	FN3KRP
ALKBH4	FRYL
ALMS1	GCLM
ALPI	GNPDA1
ALPK1	GOLGA4
ALS2	GOT2
ALS2CL	GPATCH4
AMD1	HEATR2
AMER1	HIBADH
AMER2	HIRIP3
AMMECR1	HNRNPA0
AMMECR1L	HOPX
AMOT	KIF15
AMOTL1	KIF20B
AMT	KIF23
AMZ1	KTN1
AMZ2	LARP4
ANAPC1	LARP7
ANAPC13	LHFPL2
ANGEL1	LIMCH1
ANGPT1	MAP1B
ANK2	MARCH3
ANK3	MCM3
ANKAR	MCM5
ANKMY2	MCM7
ANKRD11	MELK
ANKRD17	METTL7A
ANKRD18B	MSRB3
ANKRD20A1	MTUS1
ANKRD20A2	MYH10
ANKRD20A3	MYRIP
ANKRD20A4	NASP
ANKRD23	NAV1
ANKRD27	NCAPD2
ANKRD32	NCAPG
ANKRD34C	NCL
ANKRD39	NFIB
ANKRD40	NLGN1
ANKRD52	NMT1
ANKRD6	NOP58
ANKRD66	NUF2
ANKS1A	OBFC1
ANKS3	PALMD
ANKS6	PAQR8
ANO5	PDCD6IP
ANTXR2	PDE7B
ANXA5	PDS5A
AP000275.65	PFAS
AP000708.1	PHACTR2
AP000867.1	PHLDA1
AP1B1	PLCB1
AP2B1	PLEKHG1
AP4E1	POLE3
APBA2	POSTN
APBB1	PPARG
APBB2	PPFIBP1
APEH	PPP1R13B
APEX2	PRC1
APLF	PRKCA
APLP2	PRPH
APOBEC3H	PRTFDC1
APOC3	RAD23A
APOL3	RAD54L
APOL6	RANBP1
APOLD1	RAPGEF5
APOPT1	RBM34
APPL1	RCN2
AQP4	RIOK1
AQP9	ROCK1
AQPEP	RPL22
AQR	RPL23A
ARAP2	RPN2
ARF1	RPSA
ARFGEF2	RRM1
ARHGAP12	SBDS
ARHGAP15	SCAP
ARHGAP17	SCHIP1
ARHGAP18	SEC22A
ARHGAP25	SESN1
ARHGAP28	SGOL1
ARHGAP29	SGOL2
ARHGAP31	SHMT1
ARHGAP32	SKA1
ARHGAP4	SLC47A1
ARHGAP44	SLC7A14
ARHGAP5	SMAD3
ARHGAP6	SNX7
ARHGEF12	SOBP
ARHGEF18	SPATS2L
ARHGEF2	ST6GALNAC3
ARHGEF3	STMN1
ARHGEF37	STX2
ARHGEF4	TGOLN2
ARHGEF40	THAP10
ARHGEF9	TMEM47
ARID2	TOMM40
ARID4B	TPX2
ARID5A	TRIM4
ARID5B	TRIP13
ARL13B	TTF2
ARL17A	TXNDC15
ARL17B	UBQLN1
ARL4A	UGDH
ARL4C	UGP2
ARL5A	USP1
ARL6IP5	WSCD1
ARL6IP6	ZMAT2
ARMCX4	ZMYND11
ARNT2	ZNF512
ARNTL	AADACL1
ARPC1B	ABCA3
ARPP19	ABCB7
ARSB	ABCF1
ARSJ	ACAA2
ART4	ACO1
AS3MT	ACTG1
ASAP1	ACTR3
ASAP3	ADAMTS9
ASB1	ADCY3
ASCC2	ADD3
ASCC3	ADIPOR1
ASF1B	ADK
ASH1L	ADRB2
ASIC2	ADSL
ASNS	ADSS
ASPA	AGFG1
ASPH	AGL
ASXL1	AGPAT9
ATAD2	AHCTF1
ATAD2B	AHNAK2
ATCAY	AKAP13
ATF1	AKR1C4
ATF2	ALDH4A1
ATF6	ALS2CR4
ATG16L1	AMY1A
ATG16L2	AMY1B
ATG9A	AMY1C
ATIC	ANGEL2
ATM	ANGPT2
ATP10D	ANKRD28
ATP11AUN	ANLN
ATP13A3	ANTXR1
ATP13A5	ANXA2
ATP1A4	ANXA2P1
ATP2A2	ANXA3
ATP2B1	ANXA4
ATP2B2	APAF1
ATP2B3	APIP
ATP5A1	ARHGAP21
ATP5G3	ARHGAP22
ATP5H	ARHGAP24
ATP5O	ARHGEF6
ATP6V1A	ARL2BP
ATP6V1B1	ARMC1
ATP6V1G1	ARMCX2
ATP6V1G2-DDX39B	ARMCX3
ATP6V1H	ARMET
ATP7A	ARPC3
ATP8A2	ARPC5
ATP8B3	ASF1A
ATRIP	ASGR1
ATRX	ASPM
ATXN1	ATG4A
ATXN10	ATG4C
ATXN2	ATG5
ATXN7	ATMIN
ATXN7L1	ATP1B3
ATXN7L3	ATP5C1
AUH	ATP5L
AUTS2	ATP6V0E2
AZGP1	ATPAF1
AZU1	AURKA
B3GNT1	AURKB
B4GALNT3	BCAR3
B4GALT1	BCAT2
BAAT	BCCIP
BACE1	BCLAF1
BACH1	BID
BAG4	BIRC3
BAI1	BLVRA
BAIAP2	BMP6
BAK1	BMX
BARD1	BNIP3
BAZ2B	BOLA3
BBS2	BRD7P2
BBS7	BRIX1
BBS9	BRP44L
BBX	BTBD12
BCAP29	BTG2
BCAR1	BUB3
BCAS1	C10orf10
BCAT1	C10orf116
BCKDHB	C10orf58
BCL11B	C10orf59
BCL2	C11orf41
BCL2L12	C11orf75
BCL2L13	C11orf80
BCL2L2	C11orf82
BCL6B	C12orf26
BCORL1	C12orf35
BDH1	C12orf48
BDKRB2	C13orf27
BDNF	C13orf3
BDP1	C13orf34
BEND3	C13orf37
BEND4	C14orf106
BEND6	C14orf139
BHLHE22	C14orf145
BHMT	C14orf166
BICC1	C14orf4
BICD1	C14orf78
BIN1	C14orf80
BIRC5	C15orf23
BIVM	C16orf35
BLCAP	C16orf53
BLM	C16orf61
BLNK	C17orf53
BMF	C17orf58
BMI1	C17orf68
BMP1	C18orf55
BMP2K	C18orf56
BMP3	C19orf2
BMP5	C19orf56
BMP7	C1GALT1C1
BMPR2	C1orf112
BMS1	C1orf115
BNC1	C1orf131
BNIP1	C1orf135
BNIP3L	C1orf19
BOD1L1	C20orf11
BOLL	C20orf160
BPHL	C20orf27
BPIFB6	C20orf30
BPTF	C20orf7
BRCA1	C20orf72
BRCA2	C21orf45
BRD1	C21orf63
BRD2	C21orf7
BRD3	C2orf30
BRD4	C2orf32
BRD7	C2orf55
BRD8	C3orf26
BRINP2	C4orf18
BRMS1L	C4orf27
BROX	C4orf32
BRPF3	C4orf41
BSN	C6orf173
BST1	C6orf62
BTBD1	C8orf40
BTBD18	C9orf103
BTBD7	C9orf140
BTBD8	C9orf40
BTBD9	C9orf58
BTF3	C9orf78
BTG4	C9orf80
BTLA	CALCRL
BTRC	CALM1
BUB1	CALU
BUB1B	CANT1
BUD13	CANX
BVES	CAPN2
BX284668.1	CAPZA2
BZW2	CARM1
C10orf107	CASP2
C10orf25	CASP3
C10orf32	CAST
C10orf53	CAT
C10orf67	CAV1
C10orf68	CBR3
C10orf90	CCBL2
C11orf58	CCDC106
C11orf85	CCDC14
C11orf87	CCDC23
C11orf92	CCDC25
C12orf36	CCDC34
C12orf43	CCDC58
C12orf65	CCDC59
C12orf66	CCDC92
C14orf105	CCDC99
C14orf37	CCL14
C15orf32	CCL15
C15orf53	CCL16
C15orf57	CCM2
C16orf52	CCNA1
C16orf86	CCNB1
C17orf51	CCNB2
C17orf80	CCNE2
C18orf21	CCNH
C18orf25	CD276
C18orf54	CD99L2
C18orf63	CDC2
C19orf18	CDC20
C19orf43	CDC25C
C19orf82	CDC42EP2
C1GALT1	CDC45L
C1orf116	CDC7
C1orf141	CDCA2
C1orf168	CDCA4
C1orf177	CDCA7
C1orf21	CDCA8
C1orf53	CDK2
C1orf61	CDK4
C1QA	CDKN1B
C1QTNF2	CDKN3
C1QTNF6	CDT1
C20orf194	CEBPZ
C20orf195	CENPA
C21orf58	CENPJ
C21orf59	CENPK
C22orf39	CENPM
C2CD3	CENPN
C2orf40	CENPQ
C2orf69	CEP55
C2orf80	CEP63
C2orf83	CHAF1B
C2orf88	CHEK1
C3AR1	CKAP2
C3orf14	CKAP2L
C3orf20	CKS1B
C3orf49	CKS2
C3orf52	CLASP1
C3orf56	CLCC1
C3orf65	CLDN11
C3orf67	CLDN5
C5orf24	CLDND1
C5orf27	CLEC1A
C5orf42	CLEC2D
C5orf60	CLK1
C5orf63	CMBL
C6orf106	CNRIP1
C6orf132	COL13A1
C6orf136	COL17A1
C6ORF174	COLEC12
C6orf201	COPS4
C7orf25	COPS7A
C7orf31	COQ2
C7orf49	COQ3
C7orf55-LUC7L2	CP110
C7orf63	CPD
C8orf34	CPNE8
C8orf86	CRELD1
C9	CRIM1
C9orf131	CRKL
C9orf153	CRY1
C9orf174	CS
C9orf35	CSDA
C9orf41	CSRP2BP
C9orf69	CTDSP1
C9orf91	CTDSPL
C9orf96	CTSK
CA10	CXCL1
CA5B	CXCL2
CAB39	CXCR7
CACNA1A	CYTL1
CACNA1E	D4S234E
CACNA1I	DARS2
CACNA2D4	DBNDD2
CACNB2	DCTPP1
CACNB3	DDX21
CACNB4	DEK
CACNG2	DERA
CACNG4	DIAPH3
CACTIN	DLGAP5
CACUL1	DNAJB11
CADM2	DNAJB12
CADM3	DNAJB4
CALCOCO2	DNAJB9
CALHM1	DNAJC10
CALN1	DNAJC9
CAMK1	DNASE1L1
CAMK2D	DPYSL2
CAMK4	DPYSL4
CAMTA1	DR1
CAMTA2	DSCR3
CAP1	DSTN
CAPN14	DTD1
CAPN6	DTL
CAPRIN2	DUSP22
CAPS2	DUSP6
CAPZA1	DUT
CAPZB	DYNLT3
CARD10	ECHDC1
CARD14	ECT2
CARF	EEF1A1
CARKD	EEF1E1
CARS	EFHA1
CARTPT	EIF1AX
CASC1	EIF1B
CASK	EIF2AK1
CASP10	EIF2B2
CASP12	EIF3J
CASP7	EIF5B
CASQ2	EMILIN2
CBFA2T2	ENOPH1
CBLB	ENOSF1
CBX5	EPAS1
CBX6	ERGIC2
CBX8	EXOC6
CC2D1A	EXOSC8
CCAR1	EXOSC9
CCDC117	F11R
CCDC122	FABP4
CCDC125	FABP5
CCDC129	FABP5L2
CCDC137	FAF2
CCDC138	FAM107A
CCDC144A	FAM111A
CCDC148	FAM120A
CCDC150	FAM120AOS
CCDC151	FAM127A
CCDC159	FAM158A
CCDC170	FAM36A
CCDC173	FAM45A
CCDC175	FAM64A
CCDC18	FAM72D
CCDC183	FAM83D
CCDC186	FAM89A
CCDC30	FANCE
CCDC39	FANCG
CCDC47	FANCI
CCDC50	FBL
CCDC60	FBXO5
CCDC62	FBXW7
CCDC64B	FCHSD2
CCDC66	FEN1
CCDC69	FERMT2
CCDC7	FLJ38973
CCDC73	FLJ41200
CCDC77	FLJ43681
CCDC79	FLOT2
CCDC83	FNBP1
CCDC84	FOXJ3
CCDC85A	FOXM1
CCDC86	FRG1
CCDC88A	FRMD4A
CCDC90B	FST
CCDC91	FTH1
CCER1	FTHL11
CCL23	FTHL16
CCL28	FTHL2
CCNA2	FTHL3
CCNB3	GABARAPL2
CCND2	GABBR2
CCNF	GALNT10
CCNG2	GALNTL2
CCNJ	GARS
CCNL1	GAS2L3
CCNT1	GBAS
CCPG1	GFOD1
CCT4	GGCT
CD109	GINS2
CD1B	GINS3
CD274	GLE1
CD2AP	GLTP
CD2BP2	GMDS
CD302	GMFB
CD44	GMFG
CD46	GMNN
CD5	GNA12
CD59	GNG10
CD83	GOLPH4
CD84	GOLSYN
CD93	GORASP2
CD99	GOT1
CDADC1	GPBP1L1
CDC14A	GPD1L
CDC14B	GPR162
CDC25A	GPR177
CDC25B	GPR56
CDC27	GPSM2
CDC42	GRN
CDC42BPB	GSTO1
CDCA3	GTF2A2
CDCA5	GTF2H1
CDH1	GTF3A
CDH11	GTF3C6
CDH12	GTPBP3
CDH2	GTSE1
CDH23	H1F0
CDH26	HACL1
CDH3	HAUS4
CDH4	HCFC1
CDH5	HCFC1R1
CDH6	HDGFRP3
CDH8	HEBP2
CDHR3	HELLS
CDK12	HEY2
CDK13	HIATL1
CDK14	HIBCH
CDK15	HIGD1A
CDK18	HJURP
CDK19	HMGB1
CDK5R1	HMGB1L1
CDK5RAP1	HMGB2
CDK5RAP2	HMGN2
CDK5RAP3	HMGN4
CDK6	HMMR
CDK8	HNRNPC
CDKL5	HNRPA1L-2
CDX2	HNRPA1P4
CDYL	HNRPDL
CEBPD	HRASLS3
CELF1	HSPA14
CELF2	ID1
CELF2-AS1	IFI27L2
CELF6	IFP38
CENPC	IGFBP3
CENPE	IL8
CENPF	INPP1
CENPP	IQCK
CENPV	ITGA2
CEP120	ITGB1BP1
CEP152	ITGB3BP
CEP170	JAZF1
CEP192	JOSD1
CEP250	KAT2B
CEP350	KCNK6
CEP68	KCTD12
CEP78	KCTD9
CEP85L	KDELC2
CEP89	KIAA0101
CEP95	KIAA0114
CERS5	KIAA0494
CERS6	KIAA1279
CETN3	KIAA1712
CFB	KIF11
CFTR	KIF14
CGGBP1	KIF1B
CGNL1	KIF20A
CHAF1A	KIF22
CHAMP1	KIF2C
CHCHD5	KIF4A
CHCHD7	KIFC1
CHD2	KLF2
CHD3	KLHL5
CHD4	KPNA2
CHD5	KRT10
CHD8	KRT19
CHD9	LAMC2
CHEK2	LANCL1
CHFR	LDB2
CHGB	LGALS3
CHIA	LOC100128007
CHKB-CPT1B	LOC100128086
CHM	LOC100128266
CHML	LOC100128337
CHMP4A	LOC100128410
CHMP7	LOC100128731
CHODL	LOC100129685
CHRD	LOC100129759
CHRM2	LOC100130178
CHRM3	LOC100130561
CHRNA3	LOC100131672
CHRNB1	LOC100131940
CHRND	LOC100132547
CHST3	LOC100132715
CHST6	LOC100132863
CHST9	LOC100133328
CHSY3	LOC100133609
CHUK	LOC100134304
CHURC1-FNTB	LOC100216001
CIAPIN1	LOC124512
CIITA	LOC148915
CIPC	LOC151162
CKAP4	LOC151579
CKAP5	LOC205251
CKB	LOC283267
CLASP2	LOC283683
CLCN5	LOC345041
CLDN18	LOC387934
CLDN2	LOC388275
CLEC16A	LOC389156
CLEC1B	LOC389342
CLEC3A	LOC391169
CLEC4E	LOC399942
CLEC4F	LOC400455
CLEC5A	LOC400948
CLGN	LOC401397
CLIP1	LOC401720
CLIP2	LOC440145
CLK4	LOC440359
CLLU1	LOC441131
CLN5	LOC441743
CLNK	LOC642197
CLOCK	LOC642236
CLSPN	LOC642333
CLSTN2	LOC642567
CLUAP1	LOC642909
CLUH	LOC642975
CMC1	LOC643452
CMIP	LOC643779
CMPK1	LOC644330
CMSS1	LOC644363
CMYA5	LOC644563
CNKSR3	LOC644745
CNNM4	LOC644877
CNOT10	LOC645979
CNOT3	LOC646214
CNOT4	LOC646567
CNOT6	LOC646688
CNOT6L	LOC646821
CNPY3	LOC646849
CNST	LOC646993
CNTLN	LOC647000
CNTN2	LOC647030
CNTN6	LOC647150
CNTNAP3	LOC647276
COA1	LOC647302
COA5	LOC647340
COBL	LOC647543
COBLL1	LOC648249
COG8	LOC648740
COIL	LOC648822
COL1A1	LOC649049
COL1A2	LOC650832
COL20A1	LOC651816
COL22A1	LOC652773
COL5A2	LOC653156
COL6A3	LOC653226
COL6A6	LOC653377
COLEC11	LOC653737
COMMD2	LOC653820
COMMD9	LOC653874
COPB1	LOC727761
COPB2	LOC727803
COPS5	LOC727821
COPS8	LOC728031
COTL1	LOC728467
COX7A2	LOC728492
CPA6	LOC728843
CPEB1	LOC729082
CPEB3	LOC729342
CPM	LOC729423
CPN2	LOC729505
CPNE3	LOC729687
CPOX	LOC729816
CPSF6	LOC729841
CR2	LOC729964
CR381653.1	LOC730029
CRAT	LOC730316
CRB1	LOC730534
CRBN	LOC731049
CRCP	LOC731314
CREBBP	LOX
CREG2	LRP5
CREM	LRP8
CRHR1	LRRC32
CRNKL1	LSM3
CRTC2	LSM5
CRX	LTA4H
CRY2	LYAR
CRYBG3	LYSMD2
CSAD	LYVE1
CSDE1	MAD2L1
CSF1	MALL
CSF2RA	MAMDC2
CSMD2	MANSC1
CSMD3	MAOA
CSNK1G3	MAP2K1IP1
CSNK2A1	MAP4K4
CSNK2A2	MAPKAP1
CSPP1	MAT2B
CSRNP2	MBNL1
CSRNP3	MCM10
CSTB	MCM2
CT45A1	MCM4
CT45A2	MCM6
CT45A3	ME1
CT45A4	METTL9
CT45A5	MEX3C
CT45A6	MGAT4A
CTAGE5	MGC40489
CTB-102L5.4	MGC42367
CTB-186H2.3	MGC87042
CTB-50L17.10	MGP
CTB-50L17.14	MGST1
CTBP1	MID1
CTBS	MIF4GD
CTC-454I21.3	MINPP1
CTCFL	MLF1IP
CTD-2162K18.4	MLH1
CTD-2535L24.2	MMP10
CTD-3105H18.14	MMRN1
CTDSP2	MMS19
CTIF	MMS19L
CTLA4	MNS1
CTNNA1	MOBKL3
CTNNAL1	MOCS1
CTRC	MORF4L1
CTSC	MRFAP1L1
CTSO	MRPL15
CTSS	MRPL33
CTTNBP2	MRPL51
CTXN2	MRPS17
CUBN	MRPS31
CUL2	MRPS6
CUL4B	MRRF
CUTC	MT1F
CUX1	MTCP1
CUX2	MTDH
CWC25	MTIF3
CXCL14	MTP18
CXorf22	MUTED
CXorf36	MYOF
CXXC4	MYST3
CXXC5	NAGPA
CYB561	NAP1L1
CYB561A3	NAP1L5
CYB5A	NAV2
CYB5B	NCAPG2
CYLC2	NCK2
CYLD	NCKIPSD
CYP27A1	NDC80
CYP3A4	NDE1
CYP3A43	NDUFAF2
CYP3A7	NEK2
CYP4F12	NENF
CYSLTR2	NFIC
CYTH1	NHP2L1
CYTH2	NICN1
CYYR1	NID2
DAAM1	NOC3L
DAB1	NOL6
DACH1	NQO1
DACH2	NR2C2AP
DAO	NR2F1
DAPK2	NR5A2
DAXX	NT5C
DBF4B	NTN4
DBNL	NUCB2
DCAF10	NUDCD2
DCAF11	NUDT15
DCAF12	NUP37
DCAF5	NUP54
DCAF7	NUP88
DCK	ODC1
DCLK1	OIP5
DCLK3	OKL38
DCN	ORC2L
DCP1B	ORC6L
DCST1	OSBPL8
DCTN1	OSTCL
DCTN2	OSTF1
DCTN4	OXCT1
DCUN1D1	PABPC1
DCUN1D2	PABPC1L
DCX	PAICS
DDAH1	PAK1IP1
DDC	PAPSS2
DDHD1	PAQR4
DDI2	PBK
DDR1	PCBD1
DDX10	PCMT1
DDX11	PCNA
DDX18	PEAR1
DDX19A	PERP
DDX23	PFN1
DDX24	PGM1
DDX26B	PHCA
DDX27	PHF17
DDX39A	PHF19
DDX3Y	PHF5A
DDX41	PHGDH
DDX42	PLAC9
DDX47	PLAUR
DDX52	PLK4
DDX56	PLOD2
DEGS2	PMP22
DENND1B	PNMA2
DENND1C	PNPO
DENND2D	POLE2
DENND4A	POLE4
DENND5B	POLQ
DENND6A	PPA2
DENR	PPAP2B
DEPDC1	PPFIBP2
DEPDC1B	PPIL5
DEPDC4	PPP1CA
DERL2	PPP1CB
DESI2	PPP2R3C
DEXI	PPT1
DGAT2L6	PREI3
DGCR6	PREPL
DGKI	PRIM1
DHDDS	PRKCH
DHFR	PRKRIR
DHFRL1	PROSC
DHRSX	PRRC1
DHX36	PSRC1
DHX57	PTGES3
DHX8	PTMS
DIABLO	PTP4A2
DIAPH1	PTPLA
DICER1	PTPLB
DIDO1	PTTG1
DIEXF	PTTG3P
DIO1	PTX3
DIO2	PUS1
DIP2B	QPCT
DIS3	RAB27A
DIS3L	RAB33B
DIXDC1	RAB35
DKFZP686D09174	RAC1
DLAT	RAC2
DLC1	RACGAP1
DLD	RAD51C
DLEC1	RALB
DLGAP1	RALBP1
DLL1	RAPGEF1
DLL4	RAPGEF2
DLX1	RAPH1
DMAP1	RBBP7
DMGDH	RBBP8
DNA2	RBBP9
DNAAF3	RBM17
DNAH10OS	RFC1
DNAH2	RFC3
DNAH3	RFC4
DNAH5	RFC5
DNAH8	RFTN1
DNAJA2	RGS4
DNAJB5	RNASEH2A
DNAJB7	RNASEH2B
DNAJC13	RPA1
DNAJC16	RPA3
DNAJC17	RPGR
DNAJC2	RPL15
DNAJC21	RPL23AP13
DNAJC7	RPL39L
DNAJC9-AS1	RPLP0
DNAL1	RPS23
DNM1L	RPS26L
DNM3	RPS5
DNMT1	RRM2
DOCK1	RRM2B
DOCK3	RRP15
DOCK4	RSL1D1
DOCK5	RSRC1
DOCK7	RTN3
DOCK8	S100A10
DOCK9	S100A16
DOK5	SAAL1
DOK6	SAFB
DOLPP1	SAP30
DONSON	SASH1
DPF3	SBDSP
DPH2	SCAMP3
DPH3	SCARA3
DPH6	SCMH1
DPM1	SCRIB
DPPA3	SDCBP
DPY19L1	SDCCAG10
DPY30	SDHC
DPYS	SDPR
DPYSL3	SEC14L1
DQX1	SEPT7
DRAM2	SEPT9
DROSHA	SERBP1
DSC3	SERF1B
DSCC1	SETD3
DSG1	SETDB2
DSG4	SFRS10
DST	SFRS11
DTNB	SFRS12
DTX3L	SFRS6
DUOX2	SGCE
DUS4L	SGIP1
DUSP16	SH3BGRL2
DUSP19	SH3D19
DUSP3	SHISA5
DYM	SIRPA
DYNC1LI2	SIVA
DYNC2H1	SKA2
DYRK1A	SKAP2
DYRK2	SLBP
DYRK4	SLC1A1
DYX1C1	SLC25A19
DZIP1	SLC25A24
E2F1	SLC25A42
E2F2	SLC25A43
E2F6	SLC2A4RG
E2F7	SLC30A5
EAPP	SLC35E3
EBF1	SLC35F2
ECHS1	SLC38A1
ECM2	SLC43A3
ECT2L	SLC44A2
EDA	SLC7A2
EDC3	SLC9A1
EDEM2	SMAP1
EDEM3	SMAP2
EEA1	SMARCA1
EEF1B2	SMC4
EEF1D	SMPD1
EFCAB10	SNAPIN
EFCAB14	SNORD80
EFCAB3	SNRK
EFCAB4B	SNRNP27
EFEMP1	SNRPD2
EFHC1	SNTB2
EFNA5	SNX16
EGFR	SNX3
EHBP1	SNX5
EHHADH	SPC24
EHMT1	SPC25
EIF1	SPRY2
EIF2B3	SRPK1
EIF3M	ST6GAL1
EIF4A1	ST7
EIF4B	STAMBP
EIF4E2	STEAP1
EIF4E3	STIL
EIF4EBP2	STK32B
EIF4G1	STRA13
EIF4G2	SULT1B1
EIF5	SUV39H1
EIF5AL1	SYNC1
ELAVL1	SYT11
ELAVL4	SYT15
ELF3	TACC1
ELK3	TACC3
ELL2	TACO1
ELMSAN1	TANK
ELOVL2	TBC1D4
ELOVL6	TBC1D8
ELP3	TCEAL3
EMB	TCEAL8
EMP2	TCTEX1D2
EMR2	TDRD7
ENO1	TEAD4
ENO4	TFDP1
ENOX1	TFPI
ENOX2	THOC2
ENPP1	TIPRL
ENPP5	TK1
ENTPD1	TMBIM6
ENTPD7	TMEM106C
EOGT	TMEM123
EOMES	TMEM14A
EPB41	TMEM14B
EPB41L1	TMEM183A
EPB41L2	TMEM183B
EPB41L3	TMEM19
EPB41L4A	TMEM194
EPG5	TMEM194A
EPHA4	TMEM5
EPHA5	TMEM97
EPHA7	TMEM9B
EPHB1	TMX3
EPM2AIP1	TNFRSF1B
EPN3	TOMM34
EPS8	TOP2A
EPS8L2	TOPBP1
EPSTI1	TPD52L2
ERAL1	TPK1
ERBB2IP	TRAPPC6B
ERBB3	TRIB3
ERC1	TRMT5
ERC2	TSEN15
ERCC5	TSNAX
ERCC6	TSPAN7
ERI2	TSTD1
ERLIN2	TTK
ERMAP	TTL
ERO1L	TTLL12
ESCO1	TTRAP
ESPL1	TUBA1B
ESR1	TUBA1C
ESR2	TUBA3D
ETF1	TUBA4A
ETS1	TUBB
ETV1	TUBB2C
ETV3	TUBD1
EVC	TXNRD1
EVC2	TYMS
EVI5	UBE2C
EXD3	UBE2D2
EXO1	UBE2J1
EXOC1	UBE2Q1
EXOC3L4	UBE2T
EXOC4	UBR7
EXOC5	UCHL5IP
EXOG	UHRF1
EXOSC10	UNC84B
EXOSC3	USO1
EXPH5	USP14
EYS	UTP14C
EZH1	UTP3
EZH2	VAMP8
F11	VCP
F13A1	VIM
F2R	VPS24
F2RL1	VPS26
FAHD2A	VPS26A
FAIM2	WBP4
FAM107B	WDR4
FAM118B	WDR42A
FAM122B	WDR51A
FAM124B	WDR51B
FAM133B	WDR54
FAM134A	WRB
FAM134B	YAP1
FAM135A	YBX1
FAM13B	YEATS4
FAM13C	YWHAB
FAM153C	ZAK
FAM161A	ZCCHC17
FAM162B	ZDHHC16
FAM169B	ZNF323
FAM171B	ZNF467
FAM172A	ZNF828
FAM174A	ZW10
FAM175B	ZWILCH
FAM177B	ZWINT
FAM178A
FAM186B
FAM193A
FAM193B
FAM19A5
FAM203B
FAM205B
FAM20B
FAM210A
FAM212B
FAM216B
FAM217A
FAM217B
FAM221B
FAM222B
FAM22F
FAM23B
FAM26D
FAM26E
FAM35A
FAM47E-STBD1
FAM53A
FAM65C
FAM69A
FAM83A
FAM84A
FAM91A1
FAM92A1
FAN1
FANCD2
FAR1
FARSB
FAS
FASTKD3
FAT1
FAT3
FBN3
FBXL13
FBXL16
FBXL5
FBXO15
FBXO27
FBXO32
FBXO4
FBXO40
FBXO41
FBXO42
FBXO45
FBXO46
FBXO47
FBXW11
FCAMR
FCHO2
FCRL1
FDXACB1
FER
FER1L6
FEZF1
FFAR2
FGD2
FGD3
FGD5
FGF1
FGF18
FGF2
FGF9
FHAD1
FHL1
FHOD1
FIGN
FIP1L1
FKBP14
FKBP15
FKTN
FLAD1
FLG2
FLI1
FLII
FLT1
FLT3
FLYWCH2
FMN1
FMN2
FMNL2
FMNL3
FN3KRP
FNBP1L
FNDC3B
FNDC5
FNIP2
FNTA
FOSL1
FOSL2
FOXN2
FOXN3
FOXP2
FOXR1
FPGT-TNNI3K
FRMD3
FRMD4B
FRMD7
FRMPD3
FRMPD4
FRYL
FSCB
FSD1L
FSD2
FSTL1
FTO
FUCA2
FUK
FUNDC1
FUNDC2
FUT1
FUT10
FUT4
FUT8
FXR1
FXYD6
FYB
FYCO1
FYN
FYTTD1
FZD3
FZD5
FZD6
FZR1
G3BP1
G3BP2
GAB1
GAB3
GABARAPL1
GABPB1
GABRA4
GABRB3
GABRE
GABRG3
GAGE1
GALC
GALK2
GALM
GALNT14
GALNT16
GALNT4
GALNT5
GALNT7
GALNT8
GALNTL5
GALNTL6
GALT
GAN
GART
GAS7
GAS8
GATAD2B
GATM
GBF1
GBP3
GBP4
GBP5
GCA
GCC2
GCFC2
GCLM
GCN1L1
GCNT1
GCNT4
GCOM1
GDNF
GDPD5
GFM1
GFRA1
GGA3
GHR
GIGYF1
GIN1
GINS1
GJA9-MYCBP
GJB2
GK5
GKN2
GLCE
GLG1
GLI2
GLIPR1
GLO1
GLRB
GLS
GLTSCR1L
GLUL
GLYATL2
GMEB1
GMPPB
GNA14
GNAI1
GNAI2
GNAQ
GNAZ
GNL1
GNL3
GNLY
GNPDA1
GNPTAB
GOLGA1
GOLGA3
GOLGA4
GOLGA6L2
GOLGB1
GOLPH3L
GOLT1B
GOPC
GOSR1
GOSR2
GOT2
GPANK1
GPATCH2L
GPATCH4
GPATCH8
GPC5
GPD2
GPN3
GPNMB
GPR111
GPR126
GPR156
GPR158
GPR180
GPR19
GPR26
GPR27
GPR3
GPR64
GPR82
GPR83
GPR85
GPR98
GPRASP1
GPRIN3
GPT2
GRAMD1B
GRAP2
GREB1
GREB1L
GREM1
GRIA3
GRID2
GRIK3
GRIN2B
GRIN3A
GRK4
GRK6
GRK7
GRM1
GRPR
GRSF1
GSE1
GSPT1
GSTA1
GSTM2
GSTM4
GSTM5
GTDC1
GTF2A1
GTF2H2
GTF2I
GTF3C4
GTPBP6
GTSF1
GULP1
GXYLT1
H2AFY
H2AFZ
H6PD
HACE1
HADH
HAPLN1
HAT1
HAUS1
HAUS2
HAUS6
HAVCR2
HBS1L
HCFC2
HDAC2
HDAC4
HDAC7
HDDC2
HDHD2
HDX
HEATR1
HEATR2
HEATR4
HEATR5B
HECTD4
HELQ
HELZ
HEPACAM
HEPH
HEPHL1
HEPN1
HERC1
HERC2
HERC4
HERC5
HEXIM1
HFM1
HGSNAT
HHAT
HHIPL1
HHLA1
HHLA3
HIBADH
HID1
HIF1A
HIP1
HIPK1
HIPK2
HIPK3
HIRIP3
HIST1H2BK
HIST2H3A
HIST2H3C
HIVEP2
HLF
HLTF
HMBS
HMG20A
HMGA2
HMGCL
HMGN1
HMGXB4
HMHA1
HN1
HNF4G
HNRNPA0
HNRNPA1
HNRNPA2B1
HNRNPDL
HNRNPU
HOMER1
HOPX
HORMAD2
HOXA1
HOXA5
HOXB4
HOXC12
HOXD12
HP1BP3
HPCAL1
HPR
HPRT1
HPS3
HPS5
HRCT1
HRK
HS1BP3
HS3ST2
HS3ST4
HSCB
HSDL1
HSH2D
HSP90AA1
HSP90B1
HSPA4
HSPA4L
HSPA5
HSPB2
HTR4
HUNK
HVCN1
HYDIN
HYOU1
IBTK
ICE2
ICK
ID4
IDE
IDH1
IDS
IFIT1
IFIT2
IFIT3
IFITM10
IFNA14
IFNA16
IFNA17
IFNAR2
IFT122
IFT20
IFT57
IFT80
IFT81
IGF1
IGF1R
IGF2-AS
IGF2BP1
IGF2BP2
IGF2R
IGHMBP2
IGSF10
IGSF22
IKBKAP
IKZF1
IKZF2
IKZF5
IL10
IL10RA
IL17F
IL17RB
IL18BP
IL1A
IL21R
IL2RA
IL2RB
IL31RA
IL36G
IL36RN
ILK
IMMT
IMPAD1
IMPDH1
IMPG2
INF2
ING4
ING5
INHBA
INPP4A
INPP5D
INPP5F
INSL4
INSR
INTS2
INTS4
INTS6
INTU
IPCEF1
IPO11
IPO5
IPP
IQCB1
IQCC
IQCE
IQCF1
IQGAP1
IQGAP2
IQSEC1
IRAK1
IRAK2
IREB2
IRF4
IRF5
IRF7
IRX6
ISG20L2
ISM2
ISY1
ITFG2
ITGA2B
ITGA3
ITGA5
ITGA8
ITGB2
ITGB3
ITK
ITM2C
ITPR1
ITPR2
ITPRIP
ITPRIPL2
ITSN1
IWS1
IYD
JADE1
JAGN1
JAK3
JAKMIP2
JAM3
JMJD1C
JMY
JPH1
JPH4
KANK2
KANK4
KANSL1
KANSL2
KAT2A
KAT6A
KAT7
KATNAL1
KBTBD12
KBTBD13
KCNA1
KCNAB3
KCNC1
KCNC2
KCNC3
KCND1
KCNE3
KCNE4
KCNG3
KCNH6
KCNH7
KCNJ10
KCNJ14
KCNJ16
KCNJ5
KCNK1
KCNK10
KCNK2
KCNK3
KCNMB4
KCNN1
KCNQ5
KCNT1
KCNV1
KCTD13
KCTD19
KDF1
KDM1A
KDM1B
KDM2A
KDM2B
KDM3A
KDM3B
KDM4B
KDM4C
KDM5A
KDM7A
KDSR
KIAA0040
KIAA0100
KIAA0226
KIAA0226L
KIAA0232
KIAA0247
KIAA0368
KIAA0408
KIAA0513
KIAA0753
KIAA0895
KIAA0907
KIAA1024
KIAA1033
KIAA1045
KIAA1147
KIAA1191
KIAA1210
KIAA1211
KIAA1211L
KIAA1217
KIAA1324L
KIAA1407
KIAA1429
KIAA1456
KIAA1462
KIAA1549L
KIAA1551
KIAA1586
KIAA1598
KIAA1614
KIAA1671
KIAA1731
KIAA1958
KIAA2018
KIAA2022
KIAA2026
KIDINS220
KIF13A
KIF15
KIF1C
KIF20B
KIF23
KIF27
KIF2A
KIF2B
KIF3A
KIF3B
KIF3C
KIF5A
KIF5C
KIF6
KIF9
KIRREL
KIT
KLC1
KLC4
KLF10
KLF12
KLF6
KLF8
KLHDC1
KLHDC4
KLHDC7A
KLHL11
KLHL13
KLHL18
KLHL2
KLHL26
KLHL29
KLHL3
KLHL4
KLHL6
KLHL8
KLK10
KLK2
KMO
KMT2A
KMT2C
KMT2D
KMT2E
KNG1
KNOP1
KNSTRN
KNTC1
KPNA1
KPNA3
KPNA4
KPNA5
KPNA7
KRBA2
KREMEN2
KRR1
KRT222
KRT23
KRT4
KRT72
KRT76
KRTAP11-1
KRTAP2-1
KRTAP3-3
KSR1
KSR2
KTN1
KY
L3MBTL2
LA16c-431H6.6
LACRT
LALBA
LAMTOR3
LANCL2
LANCL3
LARP1B
LARP4
LARP7
LASP1
LATS1
LAX1
LAYN
LCMT1
LCOR
LCORL
LCP1
LDLRAD2
LDLRAD4
LECT1
LEF1
LEMD2
LEMD3
LENG8
LGI2
LGMN
LGR4
LGR5
LGR6
LHFPL2
LHX4
LIFR
LILRB4
LIMCH1
LIMK1
LIMK2
LIN7A
LINC00619
LIPG
LL0XNC01-19D8.1
LMAN2L
LMBR1
LMLN
LMNB1
LMO2
LMO4
LMO7
LMOD2
LMX1A
LMX1B
LOH12CR1
LONP1
LONP2
LONRF2
LOR
LPAR3
LPCAT1
LPGAT1
LPIN1
LPIN2
LPO
LPP
LPPR1
LPXN
LRAT
LRBA
LRCH3
LRIT3
LRP11
LRP1B
LRP4
LRP6
LRPPRC
LRRC10B
LRRC16A
LRRC17
LRRC31
LRRC38
LRRC4
LRRC46
LRRC49
LRRC55
LRRC58
LRRC6
LRRC69
LRRC74
LRRK2
LRRN1
LRRTM2
LRRTM3
LRTOMT
LSG1
LSM8
LUC7L
LUM
LURAP1L
LUZP1
LY75
LY86
LYNX1
LYPD5
LYPLA2
LYRM2
LYRM9
LYSMD1
LYST
LZTS1
MAATS1
MAB21L2
MACF1
MAGEB2
MAGED4
MAGEL2
MAGI1
MAGI3
MAGOHB
MAN1A1
MAN2A1
MAN2B2
MANEA
MANF
MAP1A
MAP1B
MAP2K3
MAP3K1
MAP3K12
MAP3K4
MAP3K7
MAP3K8
MAP3K9
MAP4K2
MAP4K3
MAP6D1
MAP7
MAP7D2
MAPK1
MAPK8
MAPK9
MAPT
MARCKS
MARK1
MARK3
MARS
MASP2
MAST4
MAT1A
MATN1
MAX
MB21D1
MBD1
MBD4
MBD5
MBLAC2
MBNL2
MBOAT1
MBP
MC2R
MCAT
MCCC1
MCF2L
MCFD2
MCL1
MCM3
MCM5
MCM7
MCMBP
MCTP2
MDGA2
MDM1
MDM2
MEAF6
MECP2
MED1
MED14
MED22
MED24
MED26
MEF2A
MEF2C
MEF2D
MEGF8
MEIS1
MELK
MEST
METAP1D
METTL10
[truncated: 2,032 more rows]

## Sheet: miR-585-5p Summary
DIANA microT predicted targets	Genes significantly repressed ≥ 1.5-fold by miRNA over-expression in HAECs	Predicted targets repressed ≥ 1.5-fold by miRNA over-expression in HAECs and differentially expressed in PMBCs
CD34	FNBP1	N/A
CYB5R3	PSME3
FLNA	AARS
MFHAS1	ABCB7
ORAI1	ABCC3
RBM38	ABI3
STAT1	ACAT1
AAK1	ACN9
AGPAT4	ACTR6
ANKRD11	ACYP1
CNOT3	ADAMTS1
COG2	ADK
D2HGDH	ADRB2
FLYWCH1	ADSS
FNBP1	AGK
GORASP2	AGL
GPS1	AGPAT9
H6PD	AIFM1
INTS2	AKR1A1
LPPR2	ALDH1A1
MAN2B2	ALG6
MAP3K11	ALS2CR4
MAPK1	AMD1
MGRN1	AMN1
NME7	ANAPC1
PSME3	ANAPC13
PTBP2	ANAPC4
RHOT2	ANGPT2
SETD3	ANKMY2
SGSH	ANKRD46
SHISA5	ANKS1A
SLC2A6	ANLN
SPCS3	ANXA1
TMEM138	ANXA2
TSPAN18	ANXA2P1
TUBGCP6	ANXA3
USP10	ANXA4
USP3	AP4B1
ABCC5	APLN
ABCC8	APOBEC3B
AC007731.1	APOL3
AC087289.1	APPBP2
AC138035.2	ARHGAP19
ADAMTS4	ARL2BP
AGAP2	ARMET
AIG1	ARPM1
ALPPL2	ARV1
ALX4	ASB3
AMDHD1	ASPM
AMIGO1	ATAD2
APC2	ATP11C
APPL2	ATP1B3
ARHGAP26	ATP5C1
ATCAY	ATP5G1
ATP6V1C2	ATP6AP1
B4GALNT1	ATP6V0E2
BAI1	ATPIF1
BCAR1	AURKA
BMP1	AURKB
BRI3	AXL
C10orf82	BARD1
C1orf21	BCAR3
C22orf42	BCCIP
C6orf136	BCL2L12
C8A	BIRC3
CALU	BIRC5
CAMTA2	BOLA3
CAPN9	BRCA1
CATSPERG	BRIX1
CCDC65	BRP44L
CCNF	BRWD1
CD247	BTAF1
CDC25B	BTBD12
CDK12	BTN3A2
CDT1	BUB1
CELF5	BUB1B
CEND1	BUB3
CHST3	C10orf116
CLYBL	C10orf59
CPZ	C11orf75
CTRB2	C11orf82
CTSH	C12orf23
CYB5RL	C12orf26
DBH	C12orf48
DBNDD2	C13orf27
DBT	C13orf3
DGKZ	C13orf34
DHRS7B	C13orf37
DIS3L2	C14orf106
DLGAP4	C14orf139
DMPK	C14orf145
DNAJC5G	C14orf169
DNMT1	C14orf80
DUS1L	C15orf23
EFCAB2	C16orf33
EFNB2	C16orf53
EGR4	C16orf61
EHD2	C16orf63
EHD3	C16orf75
EIF4E2	C17orf53
FAM214B	C17orf58
FAM221B	C17orf68
FAM43B	C18orf54
FAM78B	C18orf55
FETUB	C19orf33
FJX1	C1orf110
FSCN1	C1orf112
GDF11	C1orf135
GLI2	C1orf19
GMPS	C1orf53
GNA11	C1QTNF6
GNAL	C20orf160
GPR12	C20orf27
GPR78	C20orf72
HAVCR1	C21orf34
HCFC1	C21orf45
HCN2	C21orf58
HES3	C2orf25
HES7	C2orf47
HOGA1	C2orf55
HPD	C3orf14
HRH2	C3orf26
HS3ST2	C3orf31
IDH2	C3orf58
IGFBP3	C3orf75
INMT	C4orf32
IRF9	C4orf33
ISM1	C5orf32
ISYNA1	C5orf34
ITPR3	C5orf39
KAT2A	C6orf173
KCNC3	C7orf11
KCNMA1	C7orf44
KCNT1	C7orf55
KIF1A	C8orf40
KLHL21	C8orf55
LCMT2	C9orf103
LGALS3BP	C9orf140
LGI3	C9orf40
LIMD1	C9orf46
LIMK1	C9orf80
LINGO3	CACYBP
LONP2	CALML4
LRP5	CANX
LRRK1	CAPRIN1
LTBP4	CAPZA1
MCF2L2	CAPZA2
MEX3B	CAT
MINK1	CAV1
MITF	CBFB
MOB1A	CBR3
MORF4L2	CCDC106
MPZ	CCDC109B
MROH6	CCDC14
MTFMT	CCDC34
MUC2	CCDC58
MUM1	CCDC59
MYO18B	CCDC77
MYO1C	CCDC85A
NCAPD2	CCDC99
NCAPG2	CCL14
NELFA	CCL15
NKAIN2	CCL16
NOS1	CCL23
NPAS4	CCNA2
NUDT10	CCNB1
NUMBL	CCNB2
OPRL1	CCND3
OSBPL5	CCNE1
P2RY13	CCNE2
PANX2	CCNF
PAX2	CCNH
PDIA5	CD59
PDLIM7	CDC2
POM121C	CDC20
PPP1R36	CDC25A
PRDM15	CDC25B
PRSS35	CDC25C
PYY	CDC45L
RAB3D	CDC7
RABL2A	CDCA2
RASL10B	CDCA3
RAVER2	CDCA5
REXO1	CDCA7
RHBG	CDCA8
RHPN2	CDK2
RNF213	CDK5RAP2
RNF39	CDKN3
RP11-446E24.4	CDT1
RP11-514P8.6	CEBPD
RTP5	CENPA
RUSC2	CENPE
SCARB1	CENPF
SCLT1	CENPJ
SCRT2	CENPK
SCUBE1	CENPM
SF1	CENPN
SFRP4	CENPQ
SHMT2	CEP192
SIGLEC8	CEP55
SIX2	CEP78
SKIV2L	CFH
SLC12A4	CFI
SLC25A10	CGGBP1
SLC39A13	CHAF1B
SLC8A2	CHEK1
SLMO2	CHFR
SLX4	CHMP2B
SMG1	CHMP4A
SNX15	CIDEA
SOCS5	CITED2
SORCS2	CKAP2
SOX12	CKAP2L
SOX2	CKS1B
SPIRE2	CKS2
SPOCK1	CLCC1
SQSTM1	CLDN11
STXBP1	CLDND1
SUN2	CLEC2D
SYS1-DBNDD2	CLK1
SZRD1	CLSTN1
TENM3	CNOT1
TEX28	COL13A1
TEX28P1	COL17A1
TEX28P2	COL8A1
TGFB1I1	COMMD2
TMEM119	COPS4
TMEM154	COQ2
TMEM184A	COQ3
TMEM200C	COQ5
TMEM229A	CORO1C
TMEM248	COX7A1
TOLLIP	CPNE3
TRAPPC1	CPNE8
TRIM4	CRIM1
TRPC7	CRY1
TSPAN17	CSTF3
TTC22	CTDSP2
TUBB6	CTNNAL1
UFSP2	CTSK
UNC13A	CTSL1
VMAC	CTSO
VPS4A	CWF19L1
WDPCP	CXCL1
WT1	CXCL2
YIPF3	CYC1
ZC3H8	CYorf15A
ZCCHC14	DARS2
ZFYVE26	DCTPP1
ZNF213	DCUN1D5
ZNF282	DDX21
ZNF503-AS2	DDX39
ZNF587	DDX47
ZRANB3	DDX60
ZSWIM8	DEK
	DENR
	DEPDC1
	DEPDC1B
	DERA
	DIAPH3
	DIS3L
	DKC1
	DKK1
	DLAT
	DLGAP5
	DNAJB12
	DNAJB4
	DNAJC9
	DNM1L
	DNMT1
	DONSON
	DPY19L1
	DPY30
	DPYSL3
	DR1
	DSCC1
	DSN1
	DTL
	DUSP23
	DUT
	DYNLT1
	DYNLT3
	E2F2
	EBNA1BP2
	ECHDC1
	ECT2
	EDG1
	EEF1A1
	EEF1E1
	EEF2K
	EFR3A
	EIF1AX
	EIF1AY
	EIF3J
	EIF4A2
	EIF4G2
	ELF1
	ELOVL5
	ELOVL6
	EMILIN2
	EMP3
	ENO1
	ENOPH1
	ENOSF1
	EPAS1
	EPRS
	EPS8
	ESD
	EXO1
	EXOSC6
	EXOSC8
	EXOSC9
	EZR
	FABP5
	FABP5L2
	FAHD2A
	FAM107A
	FAM111A
	FAM120AOS
	FAM158A
	FAM160B1
	FAM162A
	FAM24B
	FAM36A
	FAM46A
	FAM64A
	FAM69B
	FAM72D
	FAM82A2
	FAM83D
	FANCD2
	FANCE
	FANCG
	FANCI
	FANCL
	FAR1
	FBL
	FBXL13
	FBXL3
	FBXO5
	FBXO8
	FEM1A
	FEN1
	FER1L3
	FEZ2
	FIGNL1
	FJX1
	FKBP5
	FLI1
	FLJ10081
	FLJ38973
	FN3KRP
	FNTB
	FOXM1
	FST
	FTH1
	FYTTD1
	G3BP1
	GABARAPL2
	GALNTL2
	GAS2L3
	GBP1
	GBP3
	GCH1
	GCLM
	GFOD1
	GGCT
	GGH
	GIMAP1
	GIMAP2
	GIMAP4
	GIMAP7
	GINS2
	GINS3
	GJA1
	GLA
	GLE1
	GLUD1
	GMFB
	GMNN
	GOLM1
	GOLPH3L
	GOLT1B
	GPBP1L1
	GPER
	GPN2
	GRB14
	GSDMC
	GSDMD
	GSTA4
	GTF2A2
	GTF3A
	GTF3C6
	GTPBP3
	GTPBP4
	GTSE1
	H1F0
	H2AFJ
	H2AFZ
	HAT1
	HAUS4
	HAUS8
	HCFC1
	HCFC1R1
	HCP5
	HDDC3
	HEG1
	HELLS
	HIBADH
	HIGD1A
	HINT2
	HIRIP3
	HJURP
	HMBS
	HMGB2
	HMGN2
	HMMR
	HNRNPA1
	HNRNPA2B1
	HNRNPC
	HNRNPH3
	HNRPA1L-2
	HNRPA1P4
	HNRPH3
	HOPX
	HOXB2
	HPRT1
	HRASLS3
	HSBP1
	HSD17B2
	HSPA12B
	HSPA5
	HSZFP36
	HTATIP2
	HYAL1
	IBTK
	ID1
	IFI27L1
	IFIT2
	IFIT5
	IFRD2
	IFT122
	IGFBP1
	IGFBP6
	IL6
	IL8
	IMPA1
	INCENP
	INO80
	INSIG1
	IQCC
	IQCK
	ITGB3BP
	ITGB4
	JAZF1
	JOSD1
	KANK1
	KBTBD2
	KCTD12
	KCTD3
	KCTD9
	KIAA0101
	KIAA0528
	KIAA1147
	KIAA1600
	KIAA1618
	KIAA1712
	KIDINS220
	KIF11
	KIF14
	KIF15
	KIF20A
	KIF20B
	KIF22
	KIF23
	KIF2C
	KIF4A
	KIFC1
	KLF2
	KNTC1
	KPNA2
	LAMB3
	LAMP3
	LANCL1
	LAP3
	LARP4
	LBR
	LDLR
	LGALS3
	LHFP
	LHFPL2
	LIMS2
	LIN9
	LMO4
	LOC100128007
	LOC100128266
	LOC100128353
	LOC100128410
	LOC100128836
	LOC100129186
	LOC100130178
	LOC100130506
	LOC100131261
	LOC100131609
	LOC100131672
	LOC100131940
	LOC100132199
	LOC100132528
	LOC100132564
	LOC100132715
	LOC100132918
	LOC100133211
	LOC100133372
	LOC100134304
	LOC143543
	LOC148915
	LOC158376
	LOC201725
	LOC283683
	LOC284230
	LOC285943
	LOC286512
	LOC341965
	LOC344887
	LOC347376
	LOC387934
	LOC388275
	LOC389168
	LOC389386
	LOC390557
	LOC391169
	LOC391811
	LOC399942
	LOC401152
	LOC401397
	LOC402112
	LOC440145
	LOC493869
	LOC642197
	LOC642817
	LOC643007
	LOC643997
	LOC644037
	LOC644124
	LOC644563
	LOC644745
	LOC644774
	LOC644877
	LOC644889
	LOC644935
	LOC645385
	LOC645436
	LOC645691
	LOC645968
	LOC646993
	LOC647000
	LOC647009
	LOC647150
	LOC647302
	LOC647340
	LOC648210
	LOC648822
	LOC649555
	LOC649839
	LOC651202
	LOC651697
	LOC651816
	LOC652595
	LOC653115
	LOC653226
	LOC653737
	LOC653820
	LOC653874
	LOC654074
	LOC654189
	LOC727761
	LOC727803
	LOC728026
	LOC728069
	LOC728467
	LOC728643
	LOC728732
	LOC729086
	LOC729102
	LOC729362
	LOC729423
	LOC729505
	LOC729687
	LOC729816
	LOC729887
	LOC729964
	LOC730246
	LOC730432
	LOC730525
	LOC730534
	LOC730746
	LOC731049
	LOC731314
	LRP8
	LRRC20
	LRRC32
	LRRC58
	LSM3
	LSM4
	LSM5
	LSMD1
	LYAR
	LYRM1
	LYSMD2
	MAD2L1
	MAK16
	MALL
	MAOA
	MAP2K1IP1
	MAPKAP1
	MAPRE1
	MASTL
	MCL1
	MCM10
	MCM2
	MCM3
	MCM4
	MCM5
	MCM6
	MCM7
	MCTS1
	MDC1
	ME1
	MED16
	MED20
	MEIS3P1
	MELK
	MET
	METTL1
	METTL7A
	MFNG
	MGAT2
	MGC16121
	MGC40489
	MGC61598
	MGC87042
	MGLL
	MGST1
	MIF4GD
	MIS12
	MKI67IP
	MKLN1
	MLEC
	MLF1IP
	MLLT11
	MMADHC
	MMRN1
	MND1
	MNS1
	MOBKL3
	MPPE1
	MPZL2
	MRPL3
	MRPL39
	MRPL42
	MRPS17
	MRPS31
	MRRF
	MSH6
	MSL3
	MSRB3
	MT1F
	MT1X
	MTCP1
	MTERFD1
	MTHFD2
	MTMR10
	MTMR9
	MTP18
	MTPN
	MYC
	MYO5C
	MYOF
	MYRIP
	NANS
	NAPRT1
	NASP
	NAT13
	NCAPD2
	NCAPG
	NCAPG2
	NCBP1
	NCK1
	NCKIPSD
	NCL
	NCOA7
	NDC80
	NDN
	NDUFA8
	NDUFAF2
	NDUFC1
	NECAP1
	NEDD4L
	NEK2
	NFATC2IP
	NHLRC3
	NHP2L1
	NIF3L1
	NIPSNAP3A
	NMI
	NMT1
	NNT
	NOC3L
	NOL6
	NOP56
	NOP58
	NOSTRIN
	NPM3
	NR1H3
	NR2F1
	NT5C
	NT5C3
	NTN4
	NUDCD1
	NUDCD2
	NUDT7
	NUF2
	NUP107
	NUP205
	NUP37
	NUP43
	NUP54
	NUP88
	NUSAP1
	OAS2
	ODC1
	OIP5
	ORC3L
	ORC6L
	ORMDL1
	OTUD6B
	OXCT1
	PABPC1L
	PAICS
	PAPSS2
	PARP1
	PARP2
	PAWR
	PBK
	PCNT
	PDE7B
	PDHA1
	PDS5B
	PECI
	PERP
	PFAS
	PFKM
	PGK1
	PGM2
	PHACTR4
	PHF17
	PHF19
	PHGDH
	PHLDB2
	PIGK
	PIGN
	PIGU
	PIK3C2A
	PIR
	PKP2
	PLAC9
	PLCXD1
	PLEKHA2
	PLEKHA9
	PLK4
	PLSCR4
	PNMA2
	PNN
	PNPLA8
	PNPO
	PNRC2
	POLA1
	POLA2
	POLD2
	POLE2
	POLE3
	POLQ
	POLR3B
	POLR3GL
	POLR3K
	POP5
	POSTN
	PPA1
	PPA2
	PPIH
	PPIL1
	PPIL3
	PPIL5
	PPP1R12A
	PRC1
	PRDX3
	PRDX6
	PRIM1
	PRKAR1A
	PRKCH
	PRMT3
	PRMT6
	PRPS1
	PRR11
	PRTFDC1
	PSIP1
	PSMA2
	PSMA3
	PSMB2
	PSMB8
	PSMC2
	PSMD14
	PSMG1
	PSMG4
	PSRC1
	PTGES3
	PTGR1
	PTPLA
	PTPLB
	PTTG1
	PTTG3P
	PURA
	PXMP3
	QDPR
	QTRTD1
	RAB11A
	RAB17
	RAB1A
	RAB21
	RAB27A
	RABGGTB
	RAC1
	RACGAP1
	RAD21
	RAD51AP1
	RAD54L
	RAN
	RANBP1
	RAPH1
	RBBP7
	RBBP8
	RBM25
	RBM34
	RBMS2
	RFC1
	RFC3
	RFC4
	RFC5
	RFTN1
	RFWD3
	RFX5
	RGS4
	RHEB
	RILPL2
	RMI1
	RNASEH2A
	RNASEH2B
	RNF138
	RNF144B
	RNF167
	RNF170
	RNF20
	RNF34
	RNF7
	ROMO1
	RPA1
	RPA3
	RPL29
	RPL34
	RPL36AL
	RPL39L
	RPS7
	RQCD1
	RRM1
	RRM2
	RRP15
	RSRC2
	RTP4
	RTTN
	RWDD4A
	S100A3
	S1PR1
	SACM1L
	SBDS
	SCARA3
	SCD
	SCHIP1
	SCO1
	SDPR
	SEC11C
	SEC23A
	SEC61A1
	SERBP1
	SERP1
	SERPINB1
	SFRS10
	SFRS11
	SFRS12
	SFRS2IP
	SFRS3
	SFRS4
	SFRS7
	SGOL1
	SGOL2
	SH3KBP1
	SHMT1
	SHRM
	SIP1
	SKA1
	SKA2
	SKAP2
	SKP2
	SLBP
	SLC16A5
	SLC20A1
	SLC24A6
	SLC25A15
	SLC25A19
	SLC25A24
	SLC25A25
	SLC30A5
	SLC35A3
	SLC35A5
	SLC35F2
	SLC37A4
	SLC38A2
	SLC48A1
	SLC7A14
	SLC7A5
	SLCO2A1
	SLFN11
	SLK
	SMAGP
	SMARCA1
	SMC2
	SMC4
	SMC6
	SNCA
	SNHG1
	SNORA11D
	SNORA18
	SNORD80
	SNRPA
	SNRPA1
	SNRPF
	SNX17
	SNX3
	SNX5
	SNX7
	SORBS2
	SPARC
	SPC24
	SPC25
	SPIN4
	SPNS1
	SQRDL
	SRPR
	SRRM1
	ST13
	ST6GAL1
	ST6GALNAC3
	STAMBPL1
	STARD3NL
	STARD8
	STEAP1
	STIL
	STMN1
	STS-1
	STX2
	STX3
	SUB1
	SUCLA2
	SULT1B1
	SUMO3
	SUOX
	SUV39H1
	SWAP70
	SYT15
	TACC3
	TACSTD2
	TAF1B
	TAP2
	TARBP1
	TBC1D16
	TBCE
	TBPL1
	TCEB1
	TCTEX1D2
	TDRD7
	TEAD4
	TERF1
	TFDP1
	TFRC
	TGM2
	THAP10
	TIMELESS
	TIMM8B
	TK1
	TM2D3
	TM9SF4
	TMED10
	TMEM106C
	TMEM118
	TMEM123
	TMEM126B
	TMEM14A
	TMEM14B
	TMEM171
	TMEM183B
	TMEM19
	TMEM194
	TMEM194A
	TMEM22
	TMEM88
	TMEM97
	TNFRSF6B
	TNFSF18
	TOMM20
	TOMM34
	TOMM5
	TOP2A
	TOPBP1
	TPK1
	TPX2
	TRAM2
	TRAPPC6B
	TRIM25
	TRIM5
	TRIM7
	TRIM78P
	TRIP13
	TRMT5
	TRNT1
	TROAP
	TSEN15
	TSEN2
	TSPAN14
	TSPAN4
	TTC32
	TTF2
	TTK
	TUBA1B
	TUBA1C
	TUBA3D
	TUBA4A
	TUBB
	TUBB2C
	TUBB4Q
	TUBD1
	TXNDC15
	TXNRD1
	UAP1
	UBE2C
	UBE2D4
	UBE2E1
	UBE2E2
	UBE2J1
	UBE2T
	UBE2V2
	UBE3A
	UCHL3
	UCHL5
	UCHL5IP
	UGP2
	UHRF1
	UHRF1BP1
	USP1
	USP13
	USP18
	USP38
	VAMP5
	VAMP7
	VCAM1
	VCP
	VDAC3
	VIL2
	VPS26
	VPS26A
	VRK1
	WARS
	WBP11
	WBP4
	WDFY1
	WDR12
	WDR33
	WDR4
	WDR40A
	WDR51A
	WDR75
	WSB1
	WWC3
	XPO1
	XPO5
	YAP1
	YEATS4
	YTHDF1
	YWHAH
	YY1
	ZAK
	ZDHHC2
	ZFYVE26
	ZMAT2
	ZNF207
	ZNF323
	ZNF467
	ZNF512
	ZNF512B
	ZNF706
	ZNF828
	ZRANB2
	ZWILCH
	ZWINT
